# Supplementary material for: Facile synthesis of nitrogen-doped carbon dots with robust fluorescence in a strongly alkaline solution and a reversible fluorescence ‘off–on’ switch between strongly acidic and alkaline solutions
Source: Royal Society of Chemistry journal article supplement (doi:10.1039/c6ra21994b), 2016-01-01
Supplement: c6ra21994b1.pdf [file c6ra21994b1.pdf]

Electronic Supplementary Material (ESI) for RSC Advances.  
This is © The Royal Society of Chemistry 2016

## Supporting Information

### **Facile synthesis of nitrogen-doped carbon dots with robust fluorescence in strong alkali and reversible fluorescence ‘off-on’ switch between strong acid and alkali**

Yingbo Liu, Liang Zhou\*, Yanan Li, Ruiping Deng, and Hongjie Zhang\*

*State Key Laboratory of Rare Earth Resource Utilization, Changchun Institute of Applied Chemistry, Chinese Academy of Sciences, Changchun 130022, People’s Republic of China*

---

\*Correspondence to: State Key Laboratory of Rare Earth Resource Utilization, Changchun Institute of Applied Chemistry, Chinese Academy of Sciences, Renmin Street 5625, Changchun 130022, People’s Republic of China. Tel.: +8643185262127; fax: +8643185685653.  
*E-mail address:* zhoul@ciac.ac.cn (L. Zhou), hongjie@ciac.ac.cn (H. Zhang).

## **Experimental section**

### **Materials**

All used reagents were analytical-grade and used as received without further purification. Citric acid monohydrate (CA), ammonium hydroxide (25.0-28.0 wt%), hydrochloric acid (36-38 wt%), sodium hydroxide, sodium chloride, sodium sulfate anhydrous, magnesium chloride hexahydrate, sodium bicarbonate, potassium chloride, potassium phosphate dibasic, potassium chloride, calcium chloride anhydrous and sodium carbonate were purchased from Beijing Chemical Work (Beijing, china). Tris(hydroxymethyl)aminomethane was purchased from Aladdin Chemistry Co, Ltd. (Shanghai, China).

### **Characterization**

UV-vis absorption spectra were recorded on a Shimadzu UV 3600 UV-VIS-NIR spectrophotometer. The fluorescence spectra were measured on a Hitachi F-7000 fluorescence spectrometer. FT-IR spectra were performed on a Bruker Tensor 27 FT-IR spectrometer in the range of 400-4000  $\text{cm}^{-1}$ . Fluorescence lifetime was measured by using a steady state and time resolved fluorescence spectrometer (FLSP-920, Edinburgh Instruments). Transmission electron microscope (TEM) analyses were performed on a FEI TECnai G<sup>2</sup> F20 instrument. X-ray diffraction (XRD) pattern was performed on a Bruker D8 Focus powder diffractometer with Cu-K $\alpha$  radiation.

### **Synthesis of fluorescent nitrogen doped-carbon dots**

CA (1.054 g) and 1800  $\mu\text{L}$  ammonium hydroxide were dissolved in 10 mL de-ionized water. Then the solution was transferred in 25 mL Teflon-lined autoclave and heated

at 200°C for 6 hours. After reaction, the reactor was cooled to room temperature by water. The product was dialyzed (3500 Da) against de-ionized water.

#### **Preparation of saturated sodium carbonate (Na<sub>2</sub>CO<sub>3</sub>) solution**

The saturated Na<sub>2</sub>CO<sub>3</sub> solution at 20°C was prepared by dissolving 21.5 g Na<sub>2</sub>CO<sub>3</sub> into 100 mL de-ionized water.

#### **Preparation of simulated body fluid (SBF)**

The SBF was prepared according to the literature.<sup>1</sup> Briefly, CaCl<sub>2</sub>, KH<sub>2</sub>PO<sub>4</sub>·3H<sub>2</sub>O, KCl, NaCl, MgCl<sub>2</sub>·6H<sub>2</sub>O, NaHCO<sub>3</sub>, and Na<sub>2</sub>SO<sub>4</sub> were dissolved in de-ionized water and buffered at pH = 7.4 using tris(hydroxymethyl)aminomethane at 36.5°C. Chemical composition of SBF (1000 mL) were listed in Table S1.

**Table S1.** Chemical composition, amount and purity of the prepared 1000 mL SBF.

| Reagents                                            | Amount  | Purity (%) |
|-----------------------------------------------------|---------|------------|
| NaCl                                                | 8.035 g | 99.5       |
| NaHCO <sub>3</sub>                                  | 0.355 g | 99.5       |
| KCl                                                 | 0.255 g | 99.5       |
| K <sub>2</sub> HPO <sub>4</sub> · 3H <sub>2</sub> O | 0.231 g | 99.0       |
| MgCl <sub>2</sub> · 6H <sub>2</sub> O               | 0.311 g | 98.0       |
| 1.0 M HCl                                           | 39 mL   | -          |
| CaCl <sub>2</sub>                                   | 0.292 g | 95.0       |
| Na <sub>2</sub> SO <sub>4</sub>                     | 0.072 g | 99.0       |
| TRIS                                                | 6.118 g | 99.0       |
| 1.0 M HCl                                           | 0-5 mL  | -          |

### Quantum yield (QY) measurements

The QYs of the as-prepared N-CDs using different amounts of ammonium hydroxide were determined by a relative method by the reference of quinine sulfate (QY = 54% in 0.1 M H<sub>2</sub>SO<sub>4</sub>). The QY of the as-prepared N-CDs was calculated according to the following equation:<sup>2</sup>

$$\phi_{CDs} = \phi_{Ref} \times \frac{A_{ref}}{I_{ref}} \times \frac{I_{CDs}}{A_{CDs}} \times \frac{\eta_{CDs}^2}{\eta_{Ref}^2}$$

Where  $\Phi$  is the QY of testing sample,  $A$  is the optical absorbance,  $I$  is the integrated fluorescence intensity and  $\eta$  is the refractive index. The subscript 'CDs' refers to the testing samples and 'Ref' refers to the referenced quinine sulfate. To minimize the reabsorption effects, the optical absorbance values were kept under 0.1 under 340 and 350 nm excitation.

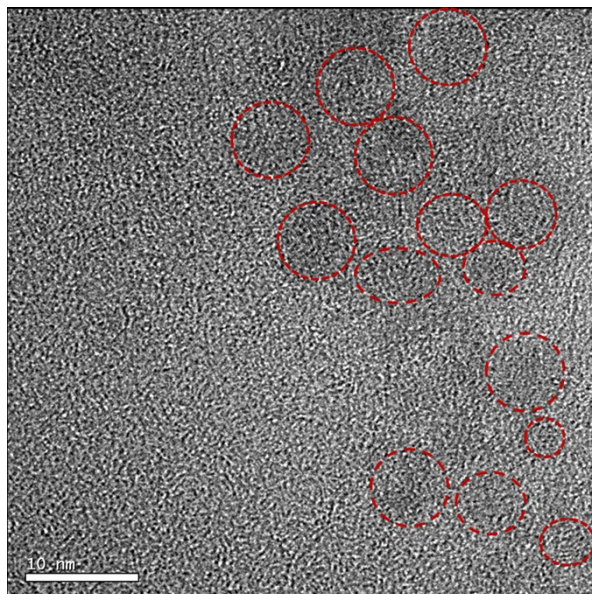

Fig. S1 HR-TEM image of N-CDs.

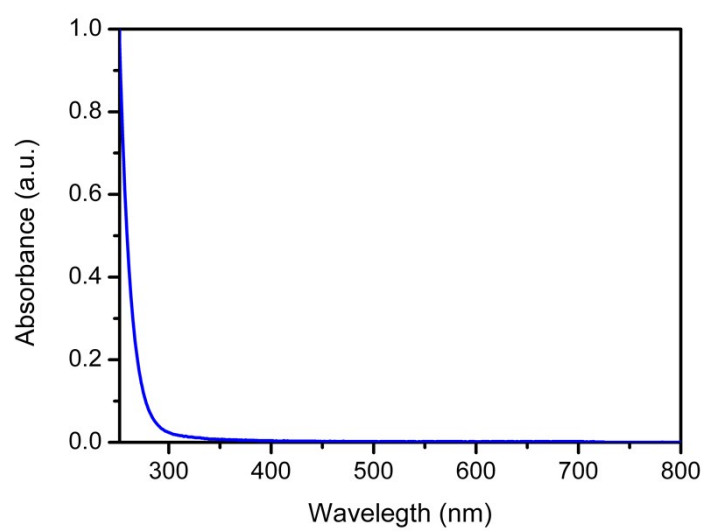

**Fig. S2** Absorption spectra of citric acid under the hydrothermal treatment at 200°C for 6 h.

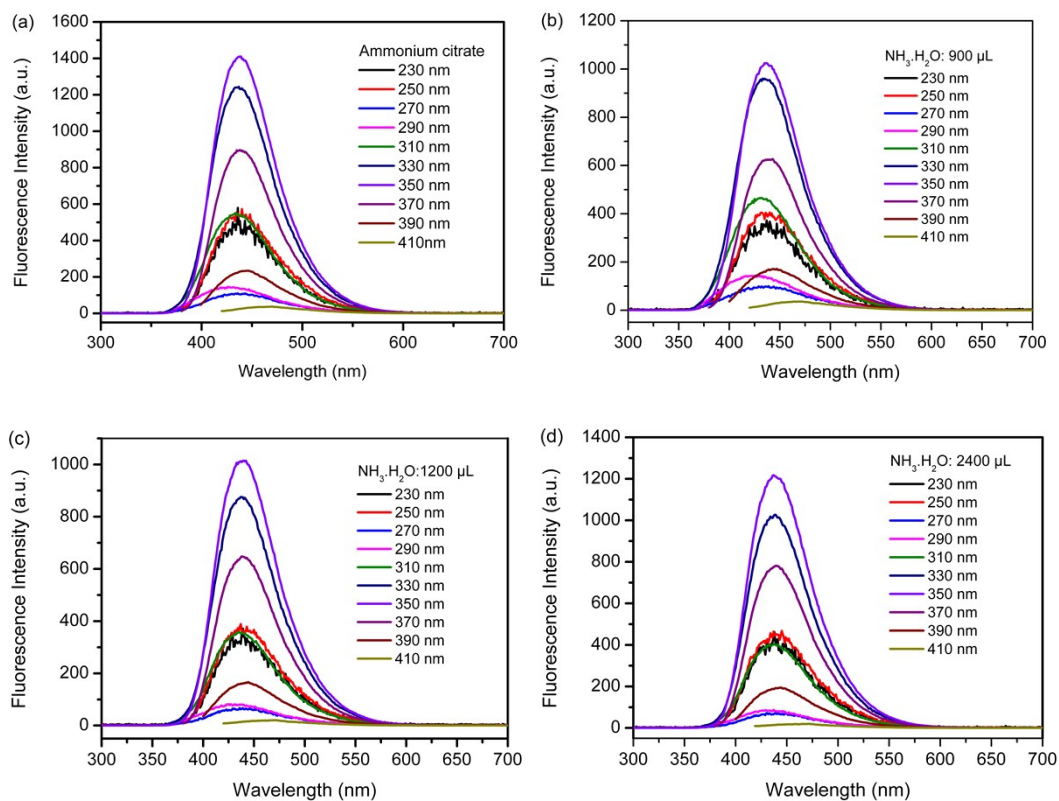

**Fig. S3** Fluorescence spectra of the as-prepared N-CDs in water using different amounts of ammonium hydroxide under the excitation wavelengths from 230 to 410 nm with 20 nm increment.

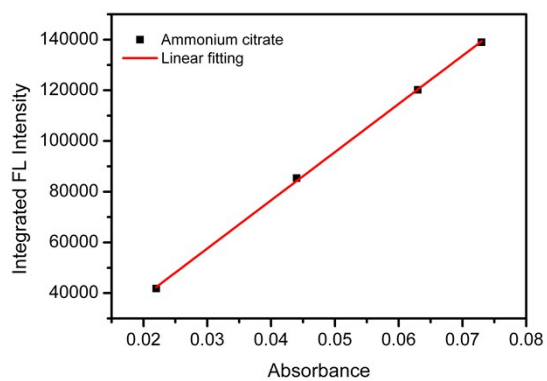

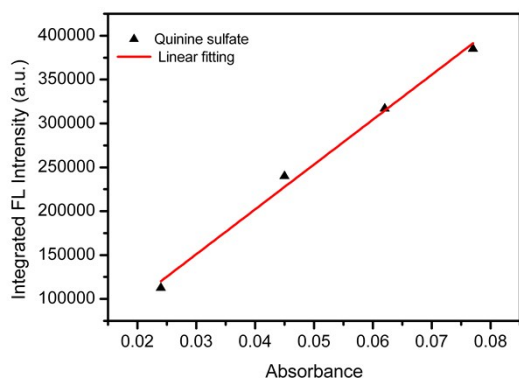

**Fig. S4** Integrated fluorescence intensity of N-CDs prepared from ammonium citrate ( $\lambda_{\text{ex}} = 340 \text{ nm}$ ) as a function of absorbance values.

**Table S2.** QY of N-CDs prepared by using ammonium citrate.

|                    | Abs-1 | Abs-2 | Abs-3 | Abs-4 | Integrated<br>FL-1 | Integrated<br>FL-2 | Integrated<br>FL-3 | Integrated<br>FL-4 | Slope<br>( $10^6$ ) | QY    |
|--------------------|-------|-------|-------|-------|--------------------|--------------------|--------------------|--------------------|---------------------|-------|
| N-CDs              | 0.022 | 0.044 | 0.063 | 0.073 | 41788              | 85372              | 120163             | 138985             | 1.90                | 0.200 |
| Quinine<br>sulfate | 0.024 | 0.045 | 0.062 | 0.077 | 112312             | 239748             | 316835             | 384866             | 5.11                | 0.54  |

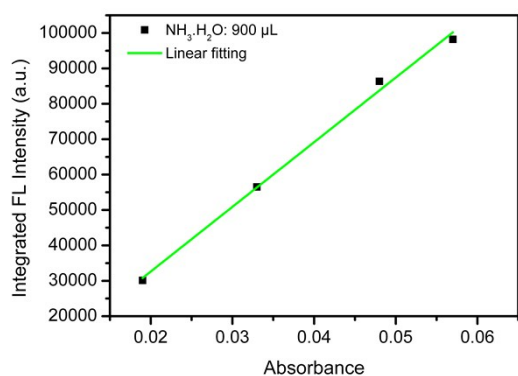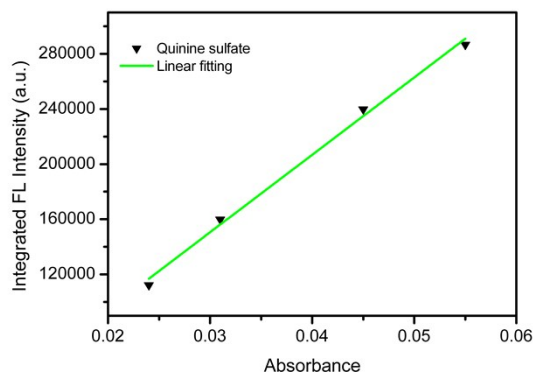

**Fig. S5** Integrated fluorescence intensity of N-CDs prepared from 900  $\mu\text{L}$  ammonium hydroxide ( $\lambda_{\text{ex}} = 340 \text{ nm}$ ) as a function of absorbance values.



**Table S3.** QY of N-CDs prepared by using 900  $\mu\text{L}$  ammonium hydroxide.

|                 | Abs-1 | Abs-2 | Abs-3 | Abs-4 | Integrated | Integrated | Integrated | Integrated | Slope      | QY    |
|-----------------|-------|-------|-------|-------|------------|------------|------------|------------|------------|-------|
|                 |       |       |       |       | FL-1       | FL-2       | FL-3       | FL-4       | ( $10^6$ ) |       |
| N-CDs           | 0.019 | 0.033 | 0.048 | 0.057 | 30138      | 56494      | 86333      | 98211      | 1.82       | 0.175 |
| Quinine sulfate | 0.024 | 0.031 | 0.045 | 0.055 | 112312     | 159920     | 239748     | 286719     | 5.61       | 0.54  |

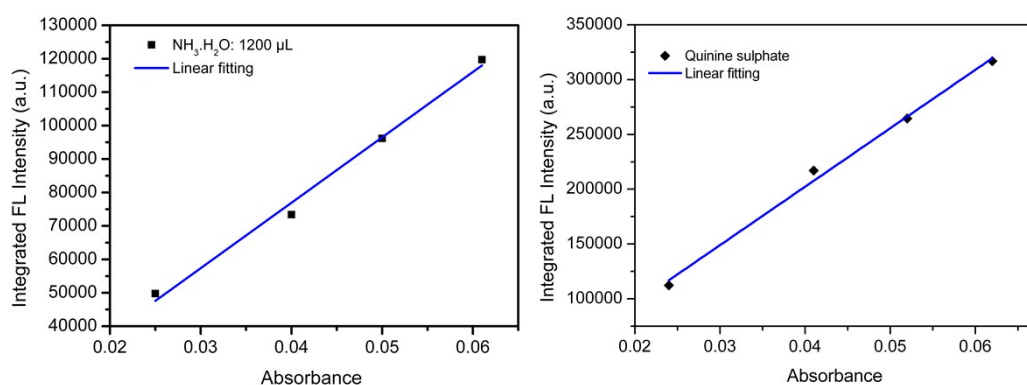**Fig. S6** Integrated fluorescence intensity of N-CDs prepared from 1200  $\mu\text{L}$  ammonium hydroxide ( $\lambda_{\text{ex}} = 340 \text{ nm}$ ) as a function of absorbance values.**Table S4.** QY of N-CDs prepared by using 1200  $\mu\text{L}$  ammonium hydroxide.

|         | Abs-1 | Abs-2 | Abs-3 | Abs-4 | Integrated | Integrated | Integrated | Integrated | Slope      | QY    |
|---------|-------|-------|-------|-------|------------|------------|------------|------------|------------|-------|
|         |       |       |       |       | FL-1       | FL-2       | FL-3       | FL-4       | ( $10^6$ ) |       |
| N-CDs   | 0.025 | 0.040 | 0.050 | 0.061 | 49764      | 73379      | 96162      | 119713     | 1.95       | 0.197 |
| Quinine | 0.024 | 0.041 | 0.052 | 0.062 | 112312     | 216955     | 264464     | 316835     | 5.33       | 0.54  |

sulfate

---

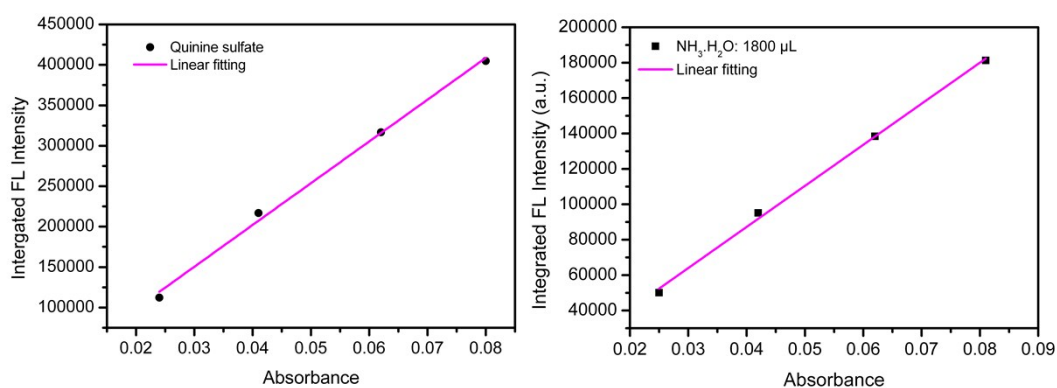

**Fig. S7** Integrated fluorescence intensity of N-CDs prepared from 1800 µL ammonium hydroxide ( $\lambda_{\text{ex}} = 350$  nm) as a function of absorbance values.

**Table S5.** QY of N-CDs prepared by using 1800 µL ammonium hydroxide.

---

|       | Abs-1 | Abs-2 | Abs-3 | Abs-4 | Integrated | Integrated | Integrated | Integrated | Slope              | QY    |
|-------|-------|-------|-------|-------|------------|------------|------------|------------|--------------------|-------|
|       |       |       |       |       | FL-1       | FL-2       | FL-3       | FL-4       | (10 <sup>6</sup> ) |       |
| N-CDs | 0.025 | 0.042 | 0.062 | 0.081 | 50115      | 95133      | 138389     | 181308     | 2.32               | 0.242 |

---

Quinine 0.024 0.041 0.062 0.08 112312 216955 316835 404955 5.16 0.54

sulfate

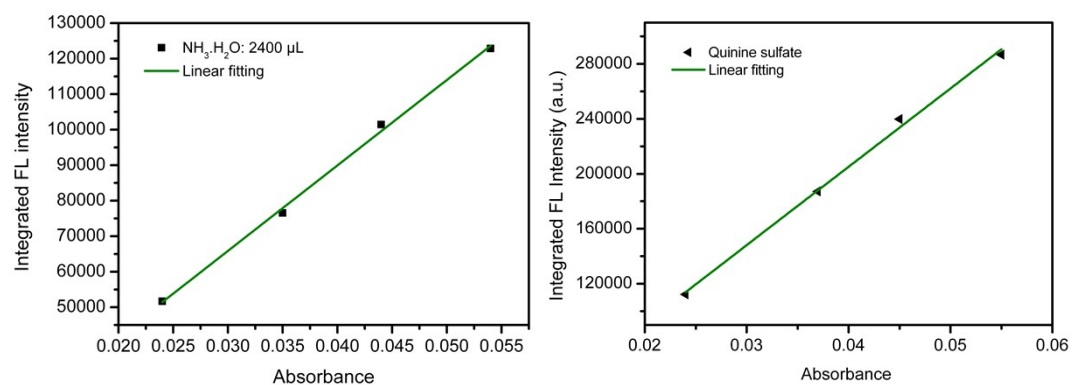

**Fig. S8** Integrated fluorescence intensity of N-CDs prepared from 2400  $\mu\text{L}$  ammonium hydroxide ( $\lambda_{\text{ex}} = 350 \text{ nm}$ ) as a function of absorbance values.

**Table S6.** QY of N-CDs prepared by using 2400  $\mu\text{L}$  ammonium hydroxide.

|       | Abs-1 | Abs-2 | Abs-3 | Abs-4 | Integrated | Integrated | Integrated | Integrated | Slope      | QY    |
|-------|-------|-------|-------|-------|------------|------------|------------|------------|------------|-------|
|       |       |       |       |       | FL-1       | FL-2       | FL-3       | FL-4       | ( $10^6$ ) |       |
| N-CDs | 0.024 | 0.035 | 0.044 | 0.054 | 51675      | 76514      | 101432     | 122859     | 2.40       | 0.227 |

Quinine 0.024 0.037 0.045 0.055 112312 187198 239748 286719 5.70 0.54

sulfate

---

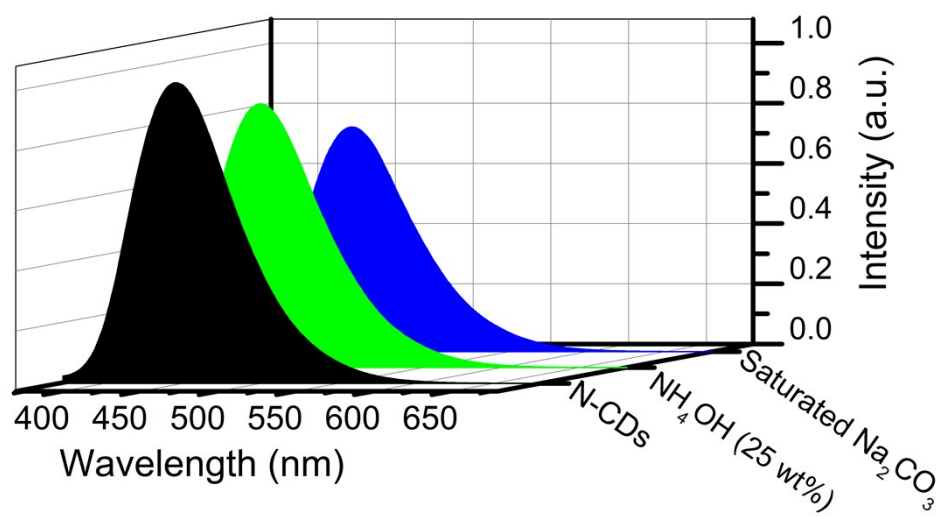

**Fig. S9** 3D fluorescence spectra of N-CDs in saturated Na<sub>2</sub>CO<sub>3</sub> (20°C) and concentrated NH<sub>4</sub>OH (25 wt %) solutions.

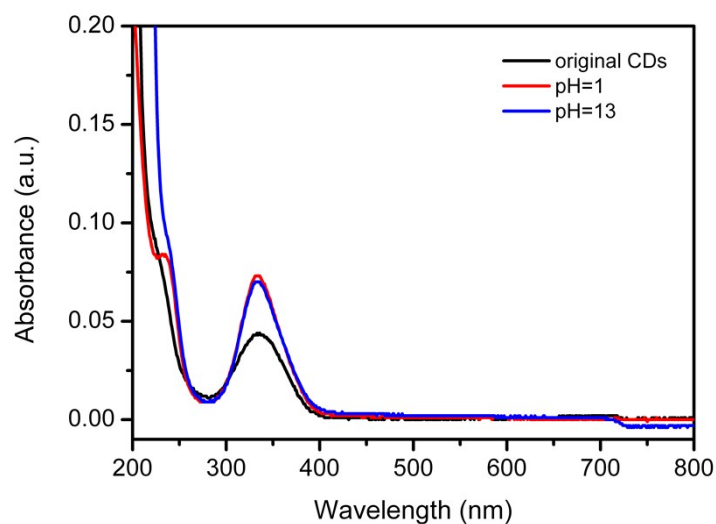

**Fig. S10** Absorption spectra of N-CDs aqueous at pH=1 and 13.

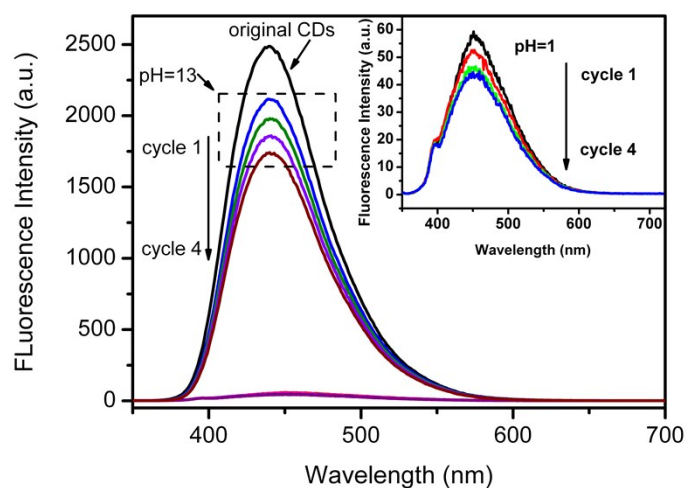

**Fig. S11** The reversible and repeatable fluorescence spectra of N-CDs when modulating pH between 1 and 13.

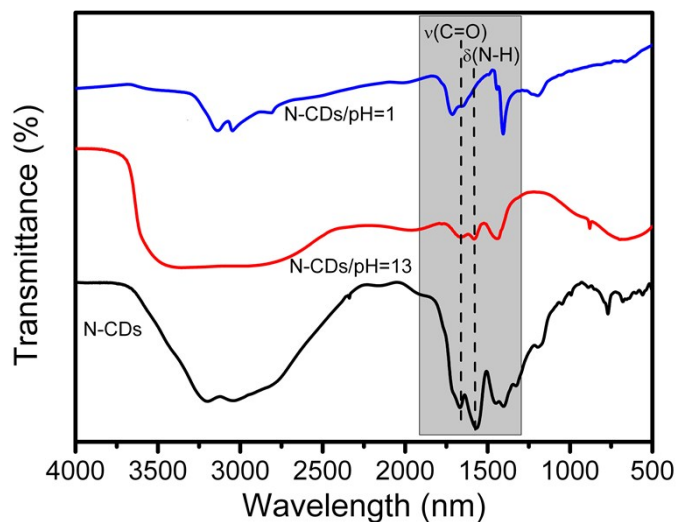

**Fig. S12** Comparison of FT-IR spectra of the N-CDs with those at pH =1 and 13.

**Table S7** Fluorescence lifetimes of the N-CDs alone and the N-CDs in pH=13 and 1 solutions.

| Sample      | $\tau_1$ (ns) | Percentage | $\tau_2$ (ns) | Percentage | $\tau_3$ (ns) | Percentage | Averaged lifetime (ns) |
|-------------|---------------|------------|---------------|------------|---------------|------------|------------------------|
| N-CDs       | 6.33          | 60.24%     | 10.52         | 39.76%     | -             | -          | 7.99                   |
| N-CDs/pH=13 | 6.44          | 87.33%     | 9.78          | 12.67%     | -             | -          | 6.86                   |
| N-CDs/pH=1  | 0.69          | 11.58%     | 3.47          | 50.83%     | 9.40          | 37.59%     | 5.37                   |

**References:**

- 1 A. Oyane, H. M. Kim, T. Furuya, T. Kokubo, T. Miyazaki and T. Nakamura, *J Biomedical Mater. Res. A*, 2003, **65**, 188.
- 2 M. Grabolle, M. Spieles, V. Lesnyak, N.Gaponik, A. Eychmüller and U. Resch-Genger, *Anal. Chem.* 2009, **81**, 6285.
